# Supplementary material for: Photooxygenations and Self-Sensitizations of Naphthylamines: Efficient Access to Iminoquinones
Source: Hindawi journal article supplement (doi:10.1155/2018/9180671), 2018-01-01
Supplement: f1 [file 9180671.f1.docx]

**Photooxygenations and self-sensitizations of** **naphthylamines: efficient access to** **iminoquinones**

WEI Ying,† TANG Lei,† ZHONG Chun-xiao, XIE Xin-miao, SUN Peng-ju, SUN Chen, ZHANG He, ZHENG Xiang-ping, WANG Xiu-li, XIE Ling-hai*

*Centre for Molecular Systems and Organic Devices (CMSOD), Key Laboratory for Organic Electronics and Information Displays & Jiangsu Key Laboratory for Biosensors, Institute of Advanced Materials (IAM), Jiangsu National Synergetic Innovation Center for Advanced Materials (SICAM), Nanjing University of Posts & Telecommunications, 9 Wenyuan Road, Nanjing 210023 (P.R. China)*

**General procedure for preparation of spiro[fluorene-9,7'-dibenzo[*c*,*h*]acridine] (1a) and its derivatives of 2-bromospiro[fluorene-9,7'-dibenzo[*c*,*h*]acridine] (1c) and 2,7-dibromospiro[fluorene-9,7'-dibenzo[*c*,*h*]acridine] (1d):**

In a two-necked schlenk flask (100 mL), FO (BrFO or DBrFO, 20mmol), 1-naphthylamine (2.86 g, 20 mmol), 1-naphthylamine hydrochloride (10.74g, 60 mmol) were added. The flask was evacuated and back-filled with nitrogen atmosphere over three times, after which o-DCB (15 mL) were injected into the flask through syringe in dark conditions. The reaction mixture was heated up to 180 °C and stirred for 7 h, then PPA (6 ml) was added into the flash through syringe rapidly and stirred for another 20 h. The mixture was neutralized by NaOH solution (6 mol/L, 50ml) then extracted three times with CH2Cl2 and the organic layer was dried over MgSO4, filtered and the solvent was removed under reduced pressure. Purification by silica gel column chromatography (petroleum ether: ethyl acetate = 10:1) to give **1a** (**1c** or **1d**).

**Spiro[fluorene-9,7'-dibenzo[*c*,*h*]acridine]** (**1a**): this compound was prepared following the general procedures by applying **FO** (3.6 g, 20 mmol) to give **1a** (2.59 g, 6 mmol) as a pale yellow solid with the yield of 30%. GC-MS (EI-m/z) calcd for C33H21N[M]+ 431.17, found 431.00. 1H NMR (400 MHz, CDCl3): *δ* 8.19 – 8.16 (d, *J* = 8.4 Hz, 2H), 7.87 – 7.85 (d, *J* = 7.6 Hz, 2H), 7.76 – 7.72 (t, *J* = 9 Hz, 3H), 7.68 – 7.64 (t, *J* = 8.2 Hz, 2H), 7.53 – 7.49 (t, *J* = 7.6 Hz, 2H), 7.41 – 7.37 (t, *J* = 7.4 Hz, 2H), 7.27 (s, 1H), 7.25 (s, 1H), 7.21 – 7.17 (t, *J* = 7.7 Hz, 2H), 7.12 – 7.10 (d, *J* = 8.4 Hz, 2H), 6.40 – 6.38 (d, *J* = 8.8 Hz, 2H).13C NMR (100 MHz, CDCl3) *δ* 157.8, 139.2, 133.2, 132.5, 128.9, 128.4, 127.7, 126.6, 126.5, 125.9, 125.8, 122.4, 120.9, 119.8, 119.0, 118.2, 77.3, 57.1. Anal. Calcd for C33H21N: C, 91.85; H, 4.91; N, 3.25. Found: C, 91.98; H, 5.05; N, 3.01.

**2-Bromospiro[fluorene-9,7'-dibenzo[*c*,*h*]acridine]** (**1c)**: this compound was prepared following the general procedures by applying **BrFO** (5.18 g, 20 mmol) to give **1c** (3.34 g, 6.6 mmol) as a pale yellow solid with the yield of 33%. GC-MS (EI-*m/z*): calcd for C33H20NBr 509.08, found 508.70. 1H NMR (400 MHz, CDCl3, ppm): *δ* 8.19 – 8.17 (d, *J* = 8.4 Hz, 2H), 7.85 – 7.83 (d, *J* = 7.6 Hz, 1H), 7.78 – 7.66 (m, 6H), 7.56 – 7.49 (m, 3H), 7.42 – 7.37 (m, 2H), 7.26 – 7.22 (m, 2H), 7.16 – 7.13 (d, *J* = 8.8 Hz, 2H), 6.39 – 6.37 (d, *J* = 8.8 Hz, 2H). 13C NMR (100 MHz, CDCl3) *δ* 159.6, 157.4, 138.4, 138.0, 133.3, 132.5, 131.0, 129.8, 128.9, 128.9, 127.9, 126.7, 126.3, 126.1, 126.0, 122.4, 122.0, 121.3, 121.1, 119.9, 119.1, 117.3, 57.3.

**2,7-Dibromospiro[fluorene-9,7'-dibenzo[*c*,*h*]acridine]** (**1d)**: this compound was prepared following the general procedures by applying **DBrFO** (6.76 g, 20 mmol) to give **1d** (3.17 g, 5.4 mmol) as a pale yellow solid with the yield of 27%. GC-MS (EI-*m/z*): calcd for C33H19NBr2 586.99, found 588.55. 1H NMR (400 MHz, CDCl3) *δ* 8.19 – 8.17 (d, *J* = 8.4 Hz, 2H), 7.80 – 7.78 (d, *J* = 8.4 Hz, 2H), 7.76 (s, 1H), 7.70 – 7.67 (m, 4H), 7.57 – 7.53 (t, *J* = 7.4 Hz, 2H), 7.52 – 7.50 (d, *J* = 8.2, 2H), 7.35 – 7.35 (d, *J* = 1.6 Hz, 2H), 7.18 – 7.15 (d, *J* = 8.8 Hz, 2H), 6.36 – 7.34 (d, *J* = 8.8 Hz, 2H). 13C NMR (100 MHz, CDCl3) *δ* 159.2, 137.2, 133.3, 132.4, 131.2, 129.9, 129.0, 126.3, 126.1, 126.1, 122.5, 122.3, 121.3, 121.3, 119.1, 116.4, 57.4.

**Synthesis of di(naphthalen-1-yl)amine (1e)**

In a two-necked schlenk flask (100 mL), 1-naphthylamine(0.72 g, 5 mmol), 1-iodonaphthalene(1.27 g, 5 mmol), KOH(0.56 g, 10 mmol), CuI (0.19 g, 1 mmol), tetrabutylammonium bromide (TBAB) (1.61 g, 5 mmol), 2,2'-dipyridyl (0.16 g, 1 mmol,), 1,10-phenanthroline (0.2 g, 1 mmol,), a piece of 18-crown-6 were added. The flask was evacuated and back-filled with nitrogen atmosphere over three times, after which o-DCB (20 mL) were injected into the flask through syringe in dark conditions. The reaction mixture was heated up to 180 °C and stirred for 24 h. The mixture was extracted three times with CH2Cl2 and the organic layer was dried over MgSO4, filtered and the solvent was removed under reduced pressure. Purification by silica gel column chromatography (petroleum ether: ethyl acetate = 10:1) to give **1e** (0.97g, 72%) as a white powder. GC-MS (EI-m/z) calcd for C20H15N+ [M]+ 269.12, found 269.05. 1H NMR (400 MHz, DMSO-*d6*) *δ* 8.33 (s, 1H), 8.17-8.15 (d, *J* = 8.4 Hz, 2H), 7.91-7.89 (d, *J* = 8.0 Hz, 2H), 7.52-7.48 (t, *J* = 8.0 Hz, 4H), 7.46-7.43 (t, *J* = 7.4 Hz, 2H), 7.34-7.30 (t, *J* = 7.6 Hz, 2H), 6.83-6.81 (d, *J* = 7.6 Hz, 2H). 13C NMR (100 MHz, CDCl3): *δ* 140.3, 134.7, 128.6, 126.9, 126.2, 126.1, 125.7, 122.4, 121.8, 115.4. Anal. Calcd for C20H15N: C, 89.19; H, 5.61; N, 5.20. Found: C, 89.38; H, 5.56; N, 5.08.

**
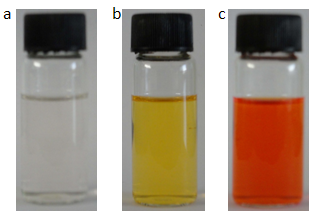
**

**Figure S1**. Photograph about this green reaction in different reaction times in sunlight: SFDBA in acetone solution (0.005 mol·L-1). a) 0 min; b) 10 min; c) 3h.


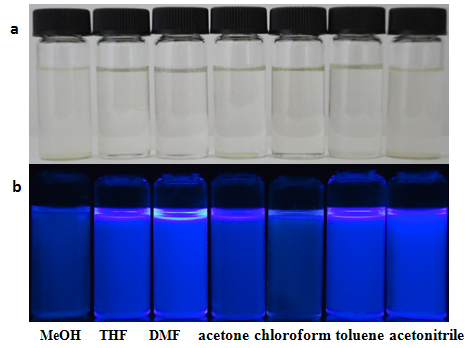


**Figure S2**. Photographs of the color and emission change of reaction solution of SFDBA in the various solvents (0.005 mol·L-1). a) before exposure to sunlight and shooting in daylight. b) before exposure to sunlight and shooting under UV lamp at 365 nm. From left to right the solvents were: MeOH, THF, DMF, acetone, CHCl3, toluene and acetonitrile.

**The crystal data of 2b and 3**


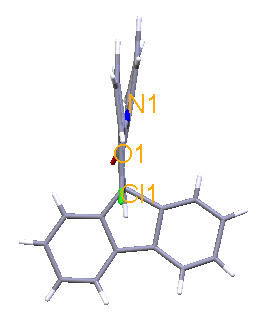

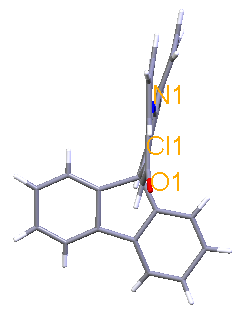


**Figure S3**. X-ray crystal structure of **2b** exhibit to be curve with some degrees in dibenzoacridines.


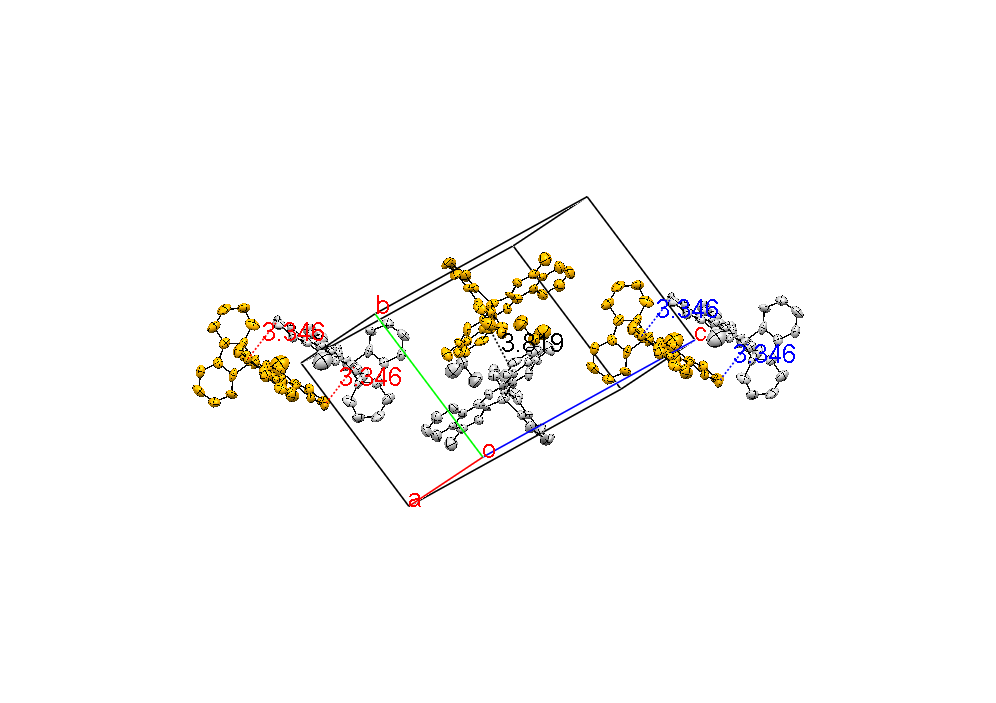


**Figure S4**. Packing structure of **2b**.


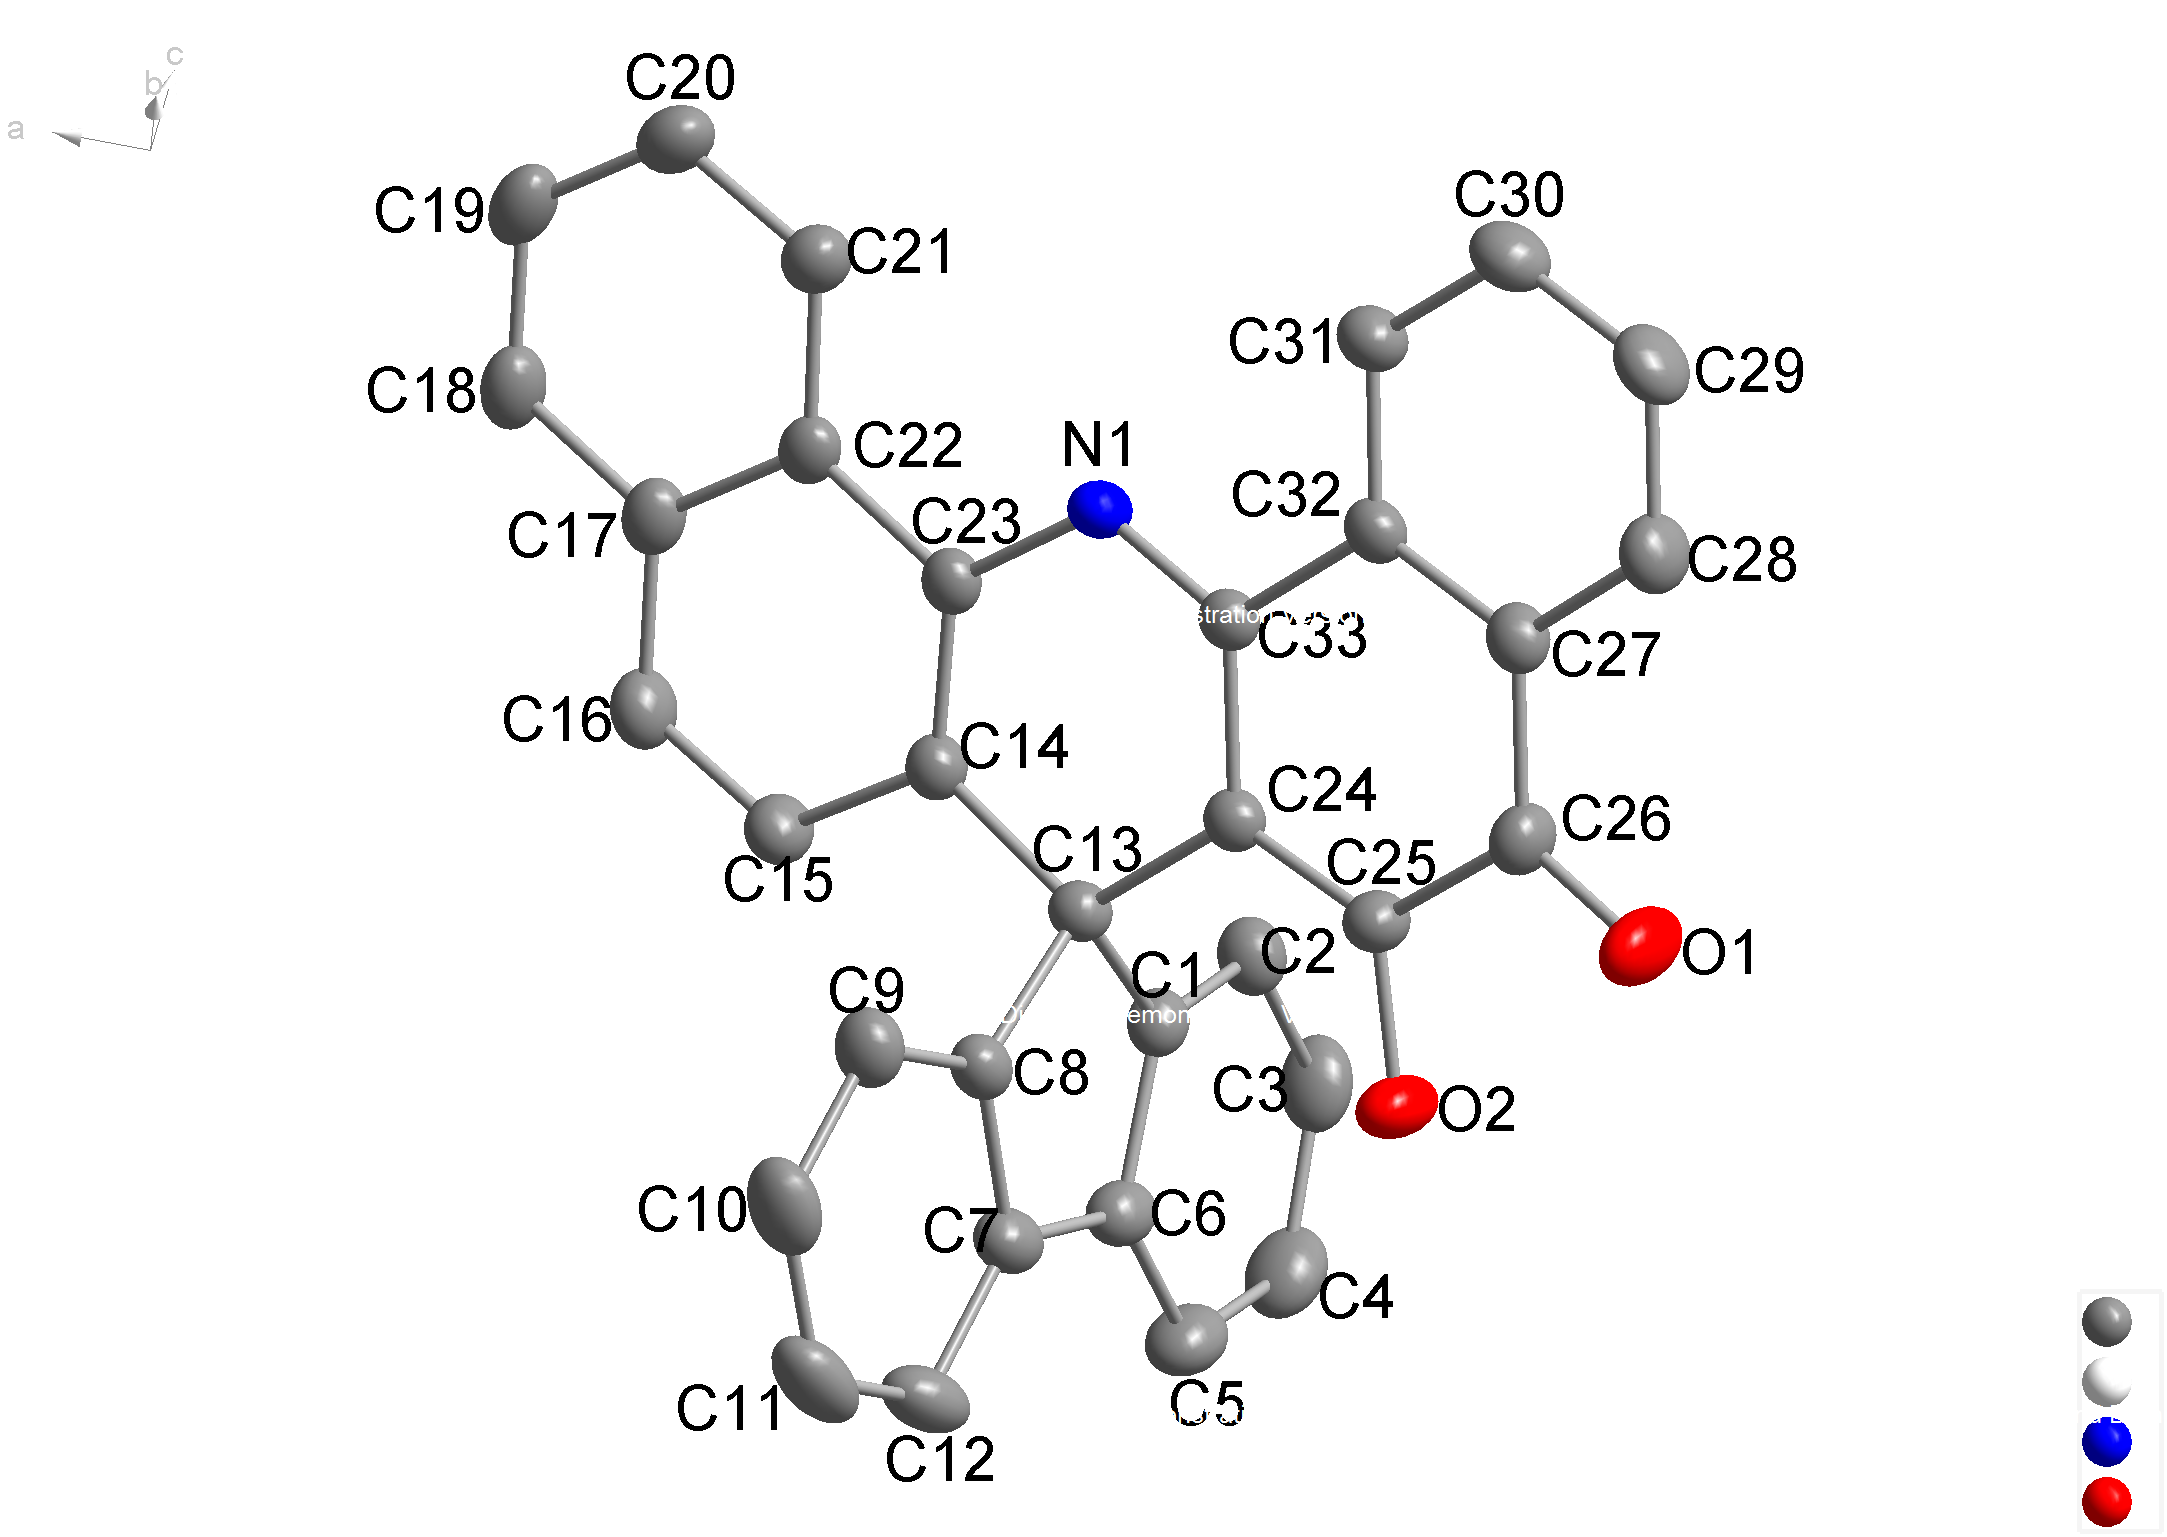


**Figure S5**. X-ray crystal structure of **3**.

**Table S1. Crystal data for 2b and 3**

|  | **2b** | **3** |
| --- | --- | --- |
| **CCDC Number** | **802655** | **1821185** |
| **Empirical formula** | C33H18ClNO | C33H19NO2 |
| **Formula weight** | 479.11 | 461.49 |
| **Crystal system** | Triclinic | monoclinic |
| **Space group** | P -1 | P 21/n |
| **a (A˚ )** | 11.656(3) | 8.107(3) |
| **b(A˚ )** | 12.844(3) | 11.918(4) |
| **c(A˚ )** | 17.797(5) | 23.242(8) |
| **α(°)** | 100.646(4) | 90 |
| **β (°)** | 105.741(4) | 93.130(4) |
| **γ (°)** | 97.183(4) | 90 |
| **V =(Å3)** | 2476.74(47) | 2242.27(120) |
| **Z** | 4 | 4 |
| **Dcalcd (mg/m3)** | 1.4009 | 1.36696 |
| **μ (mm-1)** | 0.292 | 0.085 |
| ***T* （K）** | 293 | 296 |
| **F(000)** | 1076 | 960 |
| **Nref** | 11390 | 5163 |
| ***R* (int.)** | 0.137 | 0.0748 |
| **h, k, lmax** | 15, 16, 23 | 10, 15, 30 |
| **Data completeness** | 0.923 | 0.993 |
| **Theta(max)** | 28.310 | 27.580 |
| **R(reflections)** | 0.1261(1950) | 0.0496(3519) |
| **wR2(reflections)** | 0.4403(11390) | 0.1621(5163) |
| **S** | 0.840 | 0.843 |
| **Npar** | 502 | 325 |

**Table S2. The photophysical and electrochemical properties of SFDBAOs**

| entry | DCM solution a) | | *E*ox /V | HOMO /eV b) | *E*red /V | LUMO /eV b) | *E*g /eV c) |
| --- | --- | --- | --- | --- | --- | --- | --- |
| *UV*max/nm | *PL*max/nm |
| SFDBAO | 470, 305 | 565 | 0.98 | -5.75 | -1.04, -1.35 | -3.73, -3.42 | 2.02 |
| TSFDBAO | 471, 320 | 566 | 0.96 | -5.73 | -0.99, -1.33 | -3.78, -3.44 | 1.95 |
| DTSFDBAO | 471, 353 | 566 | 0.71 | -5.48 | -1.00, -1.31 | -3.77, -3.46 | 1.71 |

a) Measured in dilute solution (10-5 M); b) HOMO/LUMO = –[*Eonset* –*E*(FC/FC)+]– 4.8 eV, *E*(FC/FC)+ = 0.03 V; c) *E*g (bandgap) = LUMO - HOMO.

**Figure S6**. Possible mechanism for the formation **ClSFDBAO (2b).**

Firstly, **SFDBA** is converted to the excited singlet state under the visible light. Subsequently, the excited triplet singlet state is formed via intramolecularly intersystem crossing (ISC) of the excited singlet state. The triplet energy of the **SFDBA** can be transferred to the ground state oxygen molecule to produce singlet oxygen. After that, an electron transfer of singlet oxygen from **SFDBA** occurs, leading to the formation of radical cation species **A**/ **B**. Then Intermediates **B** capture Cl🞄 in CCl4 and resonance, furnish chloro-substituted SFDBA product **ClSFDBA (1b)**. Finally, **1b** participates in the self-sensitizations cycle. In this cycle, naphthylamines is converted to the excited singlet state under the sunlight irradiation. Subsequently, the excited triplet singlet state is formed via intramolecularly intersystem crossing (ISC) of the excited singlet state. The triplet energy of the naphthylamines can be transferred to the ground state oxygen molecule to produce singlet oxygen to close this catalytic cycle. After that, an electron transfer of singlet oxygen from **1b** occurs, leading to the formation of radical cation species **A**/ **B**. Then a [4+2] cycloaddition is given to intermediate **C**, the O–O bond cleavage of Intermediate **C** led to intermediate **D**, which was readily oxidized by dioxygen to produce **ClSFDBAO (2b).**

**The mass spectra of compounds**


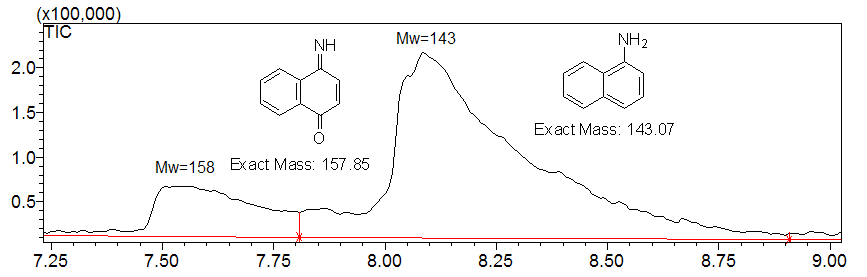


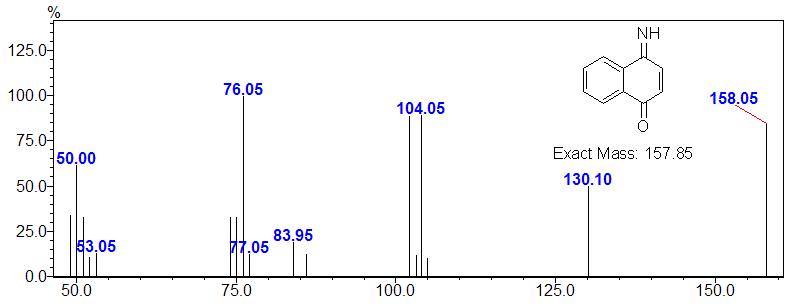


**Figure S7**. GC-MS of the crude product of **2f**.


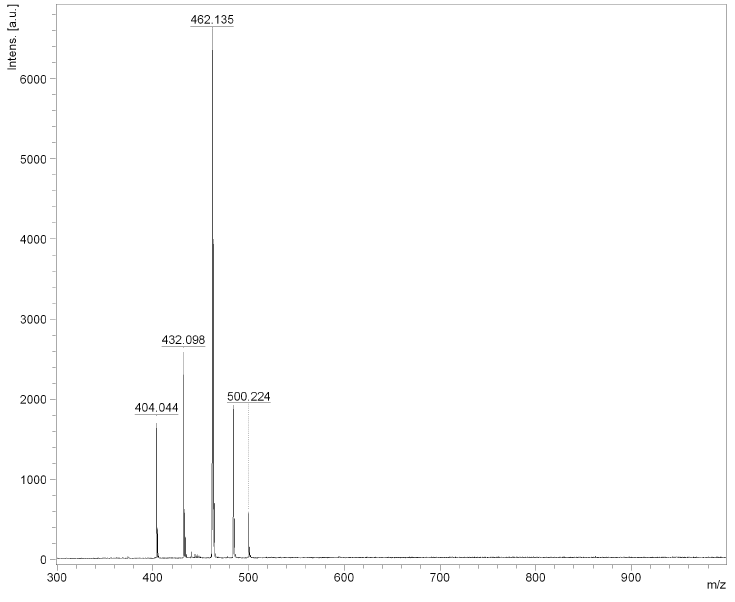


**Figure S8**. MALDI-TOF-MS of **3.**

**1H and 13C NMR spectra of products**


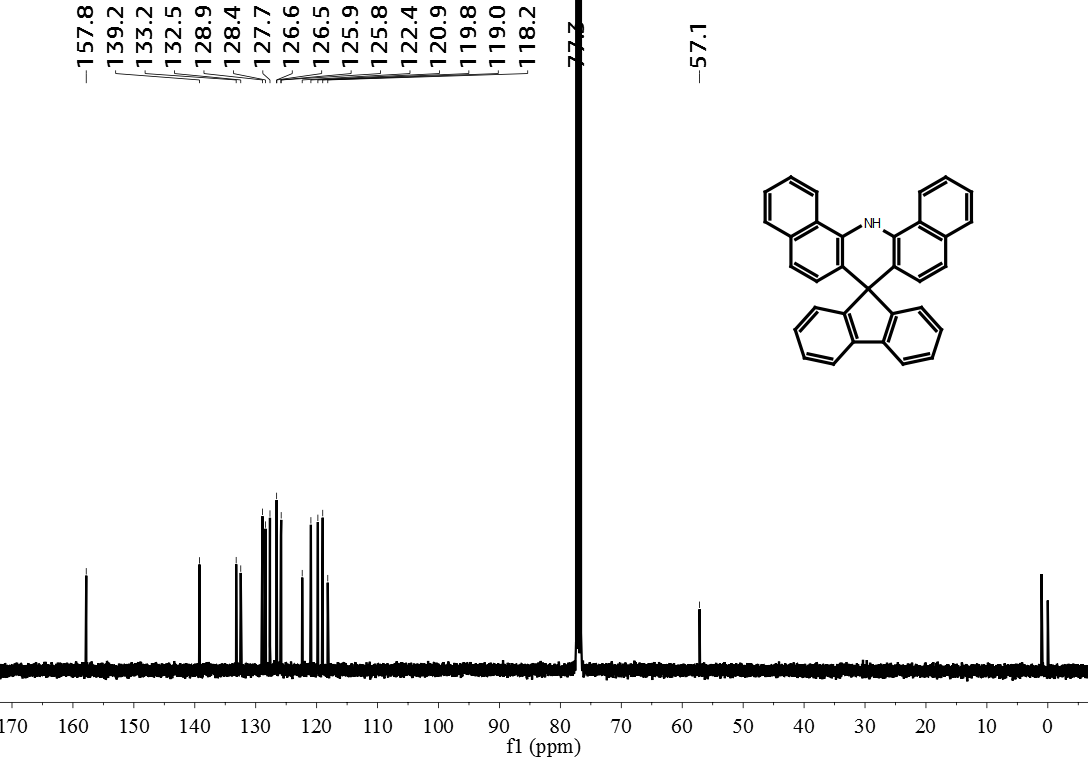


**Figure S9**. 1H-NMR and 13C-NMR spectra of **1a**.


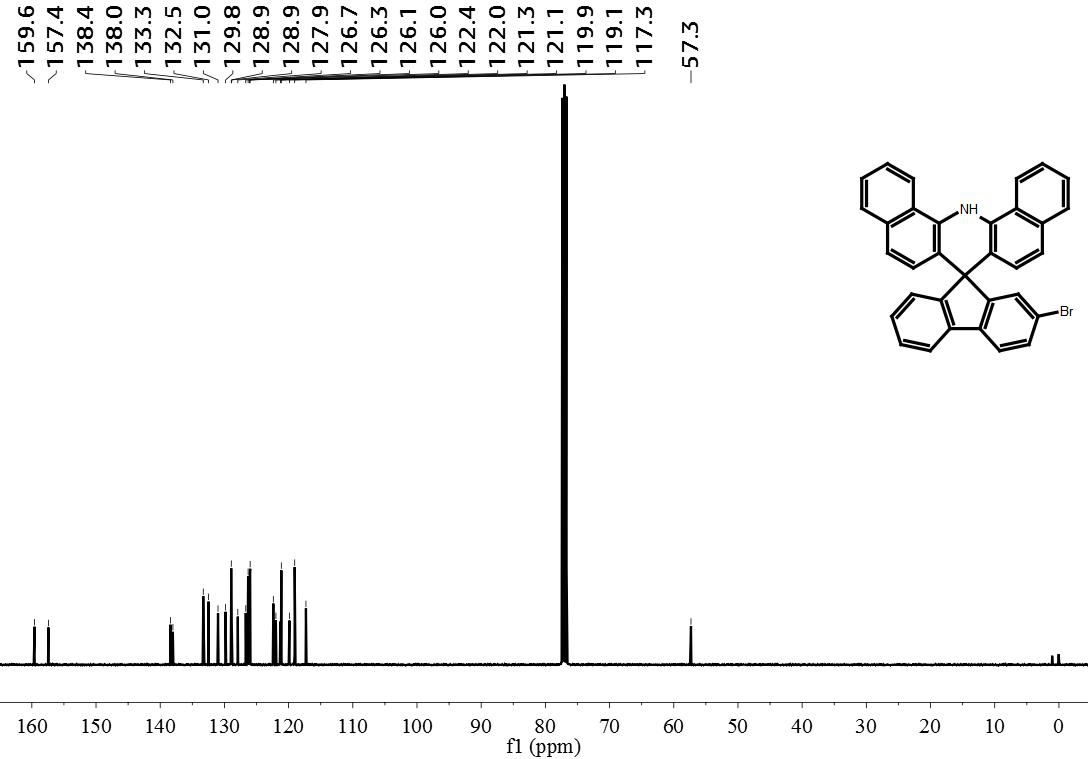


**Figure S10**. 1H-NMR and 13C-NMR spectra of **1c**.

**Figure S11**. 1H-NMR and 13C-NMR spectra of **1d**.


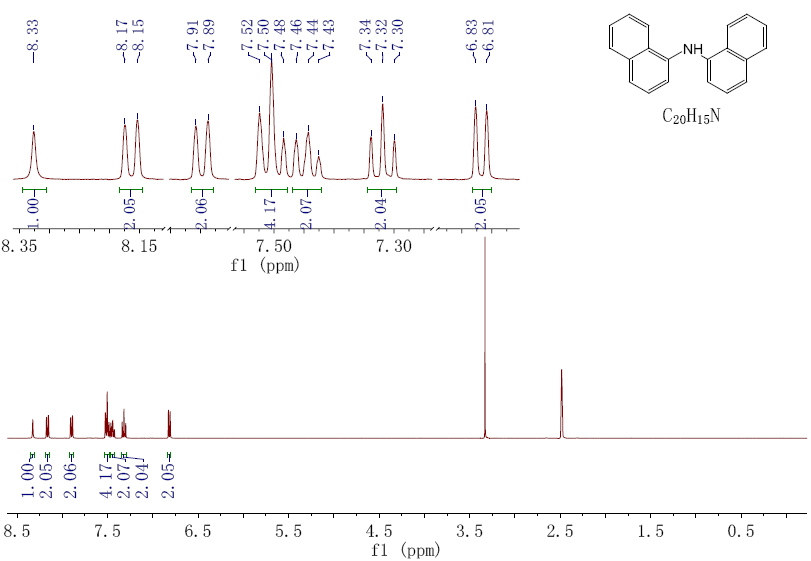


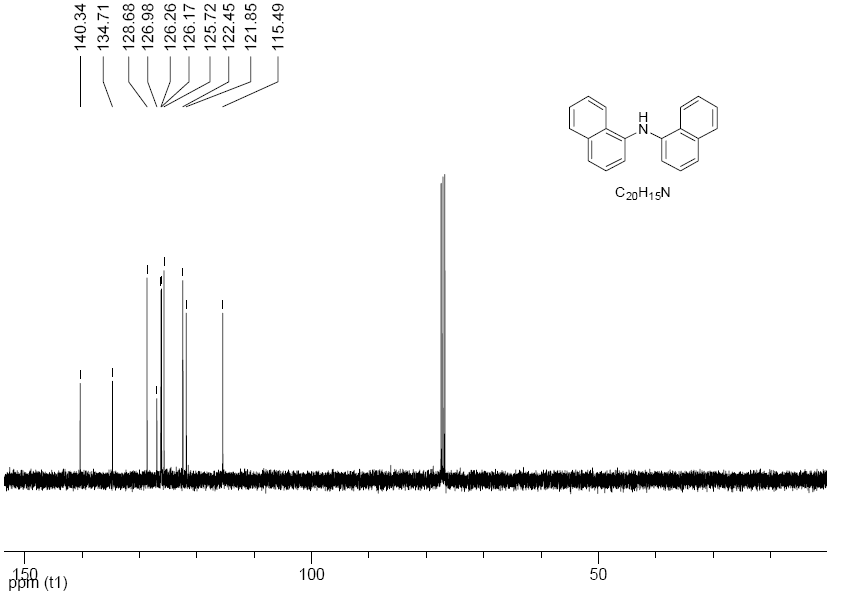


**Figure S12**. 1H-NMR and 13C-NMR spectra of **1e**.

**Figure S13**. 1H-NMR and 13C-NMR spectra of **2a**.

**Figure S14**. 1H-NMR and 13C-NMR spectra of **2b**.

**Figure S15**. 1H-NMR and 13C-NMR spectra of **2c**.

**Figure S16**. 1H-NMR and 13C-NMR spectra of **2d**.

**Figure S17**. 1H-NMR and 13C-NMR spectra of **2e**.

**Figure S18**. 1H-NMR and 13C-NMR spectra of **3**.

**Figure S19**. 1H-NMR and 13C-NMR spectra of **TSFDBAO**.

**Figure S20**. 1H-NMR and 13C-NMR spectra of **DTSFDBAO**.
